# Supplementary material
Source: Research Square preprint supplement (doi:10.21203/rs.3.rs-8976504/v1)
Supplement: Supplementary file 1 [file 57db08f9d390492555ebcac0.docx]

**A Multicenter, Prospective, Exploratory Clinical Study of Herombopag Olamine Tablets for Secondary Prevention of Thrombocytopenia Caused by Breast Cancer Treatment**

**Study Protocol**

**Version Number: 2.6**

**Version Date: January 28, 2025**

**Principal Investigator: Yan Min**

**Study Site: Henan Cancer Hospital**

# Protocol Signature Page of Investigator

I will diligently perform the duties of an investigator in accordance with Chinese GCP regulations, and personally participate in or directly supervise this clinical study. I have received the Investigator's Brochure for the investigational product of this clinical study; I am aware of and have read the preclinical study information of the investigational product and the protocol of this clinical study. I agree to perform relevant duties in accordance with Chinese law, the Declaration of Helsinki, Chinese GCP, and this study protocol. Unless it is necessary to take measures to protect the safety, rights, and interests of the subjects, I will only modify the protocol after notifying the sponsor and obtaining consent, and will implement it only after obtaining approval from the Ethics Committee.

**Study Site:** __________________________________________

|  |  |  |
| --- | --- | --- |
| Principal Investigator (Print) | Principal Investigator (Signature) | Date of Signature (DD/MM/YYYY) |

**Table of Contents**

[**Protocol Signature Page of Investigator 2**](#_Toc218764114)

[**Protocol Synopsis 4**](#_Toc218764115)

[**Schedule of Assessment 8**](#_Toc218764116)

[**1. Study Background 10**](#_Toc218764117)

[**2. Study Objective and Endpoints 15**](#_Toc218764118)

[2.1 Study Objective 15](#_Toc218764119)

[2.2 Study Endpoints 15](#_Toc218764120)

[**3. Investigational Product 16**](#_Toc218764121)

[3.1 Generic Name: Herombopag Olamine tablets 16](#_Toc218764122)

[**4. Study Design 16**](#_Toc218764123)

[4.1 Overall Design 16](#_Toc218764124)

[4.2 Concomitant Medications and Concomitant Therapy 18](#_Toc218764125)

[**5. Subject Selection and Withdrawal 18**](#_Toc218764126)

[5.1 Inclusion Criteria 18](#_Toc218764127)

[5.2 Exclusion Criteria 19](#_Toc218764128)

[5.3 Subject Treatment Discontinuation Criteria andStudy Termination Criteria 20](#_Toc218764129)

[**6. Study Procedures 20**](#_Toc218764130)

[6.1 Screening Period Visit 21](#_Toc218764131)

[6.2 Platelet-Increasing Drug Intervention Period Visit 21](#_Toc218764132)

[6.3 End of Study or Withdrawal Follow-up Assessment 22](#_Toc218764133)

[6.4 Safety Follow-up Period Assessment 22](#_Toc218764134)

[**7. Adverse Event Reporting 22**](#_Toc218764135)

[7.1 Definition and Recording of Adverse Events 22](#_Toc218764136)

[7.2 Criteria for AE Severity 23](#_Toc218764137)

[7.3 Determination of Causality between AE and the Study Drug 24](#_Toc218764138)

[7.4 Serious Adverse Events 24](#_Toc218764139)

[7.5 Collection/Follow-up of AEs/SAEs and Reporting of SAEs 25](#_Toc218764140)

[7.6 Reporting of Pregnancy 26](#_Toc218764141)

[7.7 Disease Progression and Death 27](#_Toc218764142)

[**8. Study Management 28**](#_Toc218764143)

[8.1 Ethics and Informed Consent 28](#_Toc218764144)

[8.2 Data Management 28](#_Toc218764145)

[**9. Data Analysis and Statistical Methods 29**](#_Toc218764146)

[9.1 Sample Size Calculation 29](#_Toc218764147)

[9.2 Analysis Populations 29](#_Toc218764148)

[9.3 Statistical Methods 30](#_Toc218764149)

[**10. Clinical Study Timeline 32**](#_Toc218764150)

[**11. References 32**](#_Toc218764151)

# Protocol Synopsis

| **Study Title** | A Multicenter, Prospective, Exploratory Clinical Study of Herombopag Olamine Tablets for Secondary Prevention of Thrombocytopenia Caused by Breast Cancer Treatment |
| --- | --- |
| **Sponsor** | Henan Cancer Hospital |
| **Principal Investigator** | Yan Min |
| **Study Objective** | To evaluate the efficacy and safety of herombopag for the secondary prevention of thrombocytopenia caused by breast cancer treatment, and to verify the efficacy and safety of herombopag for the treatment of thrombocytopenia caused by breast cancer. |
| **Study Rationale** | Tumor treatment-induced thrombocytopenia increases the risk of haemorrhagic complications and the need for platelet transfusions, and may limit the dosage of cytotoxic drugs in the treatment of certain malignant neoplasms. Thrombopoietin receptor agonists (TPO-RA) have a therapeutic effect on tumor treatment-induced thrombocytopenia (CTIT). Herombopag, as an innovative TPO-RA drug with a more optimized molecular structure and reduced hepato-renal toxicity, is currently undergoing a registrational Phase 3 clinical study in patients with CTIT. This study plans to explore the efficacy and safety of herombopag in breast cancer tumor treatment-induced thrombocytopenia, to further guide the clinical application of herombopag in tumor treatment-induced thrombocytopenia. |
| **Study Subjects** | Breast cancer patients with tumor treatment-induced thrombocytopenia (PLT<50×109/L) |
| **Study Methods** | Multicenter, prospective, exploratory clinical study |
| **Sample Size** | This is a multicenter, prospective, exploratory study with no statistical hypothesis. Based on early study data, the response rate of platelet elevation in the second cycle is expected to reach 50% for patients with thrombocytopenia caused by breast cancer treatment who are treated with herombopag in this study. Calculated using NCSS PASS 21 (LLC. Kaysville, Utah, USA, ncss.com/software/pass), with an enrollment of approximately 60 subjects, the two-sided 95% confidence interval ([Clopper-Pearson method]) for the platelet elevation response rate in the second cycle is [37%, 63%]. |
| **Study Design** | This is a multicenter, prospective, exploratory clinical study. The study includes a screening period (not exceeding 7 days) and a platelet-increasing drug intervention period (2 tumor treatment cycles). Therapeutic use for thrombocytopenia will be conducted in the 1st tumor treatment cycle. Prophylactic use for thrombocytopenia will be conducted in the 2nd tumor treatment cycle.  Subjects will undergo screening evaluation within 7 days before the first dose to determine their eligibility. Eligible subjects can participate in the trial, and treatment discontinuation will occur after two cycles of use according to the treatment regimen.  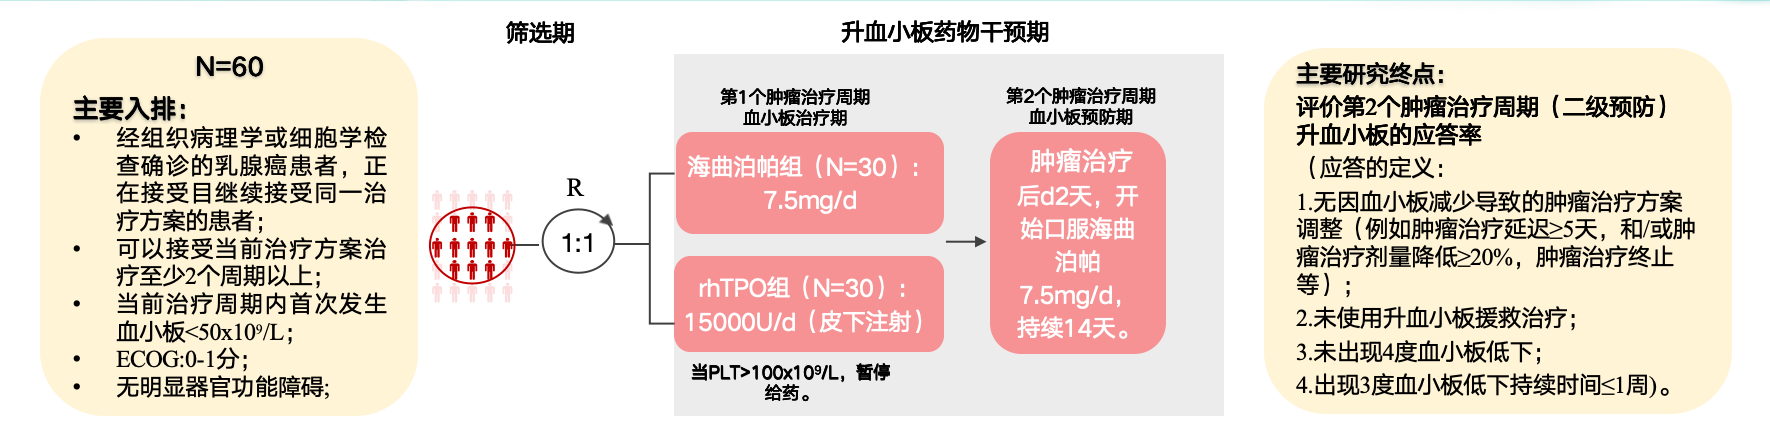  **Screening Period**  **Platelet-increasing Drug Intervention Period**  **N=60**  **Main Inclusion/Exclusion Criteria:**   - Patients with breast cancer confirmed by histopathology or cytology who are currently receiving and will continue to receive the same treatment regimen; - Able to receive treatment with the current treatment regimen for at least 2 cycles; - First occurrence of platelet count <50x109/L during the current treatment cycle; - ECOG score: 0-1; - No significant organ dysfunction;   **Primary Endpoint**  **Evaluation of the 2nd tumor treatment cycle (secondary prevention)**  **Response rate of platelet elevation**  (Definition of response:  1. No adjustment of the tumor treatment regimen due to thrombocytopenia (e.g., tumor treatment delay >5 days, and/or tumor treatment dose reduction ≥20%, treatment discontinuation, etc.);  2. No use of platelet-increasing rescue therapy;  3. No occurrence of Grade 4 thrombocytopenia;  4. Duration of Grade 3 thrombocytopenia ≤1 week).  **1st tumor treatment cycle**  **Platelet treatment period**  **2nd tumor treatment cycle**  **Platelet prevention period**  **When PLT > 100x109/L, dosing is suspended.**  **Herombopag group (N=30):**  **7.5mg/d**  **Recombinant human thrombopoietin (rhTPO) group (N=30):**  **15000 U/d (subcutaneous injection)**  **On day 2 after tumor treatment, start oral herombopag 7.5 mg/d for 14 days.** |
| **Therapeutic Drug** | Herombopag (produced and provided by Jiangsu Hengrui Pharmaceuticals Co., Ltd.)  Once daily, taken orally on an empty stomach. Meals can be taken 2 hours after oral administration. Avoid taking with food (it is recommended to take on an empty stomach in the morning and before bedtime)  The following products should be consumed at least 2 hours after taking the medication, including dairy products (e.g., milk, yogurt, cheese, and ice cream) or mineral supplementation containing polyvalent cations (e.g., aluminum, calcium, magnesium, iron, selenium, and zinc).  rhTPO (recombinant human thrombopoietin injection)  15000 units/1 mL, subcutaneous injection. |
| **Treatment Regimen** | **1st tumor treatment cycle (multicenter, open-label):**  **Therapeutic use:** Starting from day 6 after the end of tumor treatment, blood will be drawn and subject's complete blood count will be collected every other day. Randomization will be performed when platelet count is <50×109/L. Enrolled patients will be assigned to the herombopag group and the rhTPO group at a 1:1 ratio.  Herombopag group (30 cases): When platelet count is <50×109/L, start oral herombopag 7.5 mg/day. When platelet count > 100×109/L, dosing is suspended.  Note: When platelet count is <10.0×109/L or there is a risk of haemorrhage, platelet transfusion may be considered based on the clinical situation.  rhTPO group (30 cases): When platelet count is <50×109/L, start TPIAO 15000 units/day (subcutaneous injection). When platelet count > 100x109/L, dosing is suspended.  Note: When platelet count is <10.0×109/L or there is a risk of haemorrhage, platelet transfusion may be considered based on the clinical situation.  **2nd tumor treatment cycle (exploratory study):**  **Prophylactic use (total 60 subjects in herombopag group and rhTPO group):** Starting from day 2 after the end of tumor treatment, take oral herombopag 7.5 mg/day (starting dose) for 14 consecutive days. After herombopag administration, the subject's complete blood count will be collected every other day.  The dose adjustment rules for herombopag are as follows:  When platelet count is ≥200×109/L and ≤400×109/L, the daily dose is reduced by 2.5 mg;  When platelet count rises to ≥400×109/L, dosing can be suspended and resumed when platelet count drops to <200×109/L, with the daily dose reduced by 2.5 mg;  Note: The period of drug suspension is also counted within the 14 days. When platelet count is <10.0×109/L or there is a risk of haemorrhage, platelet transfusion may be considered based on the clinical situation.  Dosing Diagram:  **Day 2 after tumor treatment, start oral herombopag 7.5 mg/d for 14 days**  **Observe treatment dose and timing in the 3rd treatment cycle**  **1st treatment cycle**  **2nd treatment cycle**  **3rd treatment cycle**  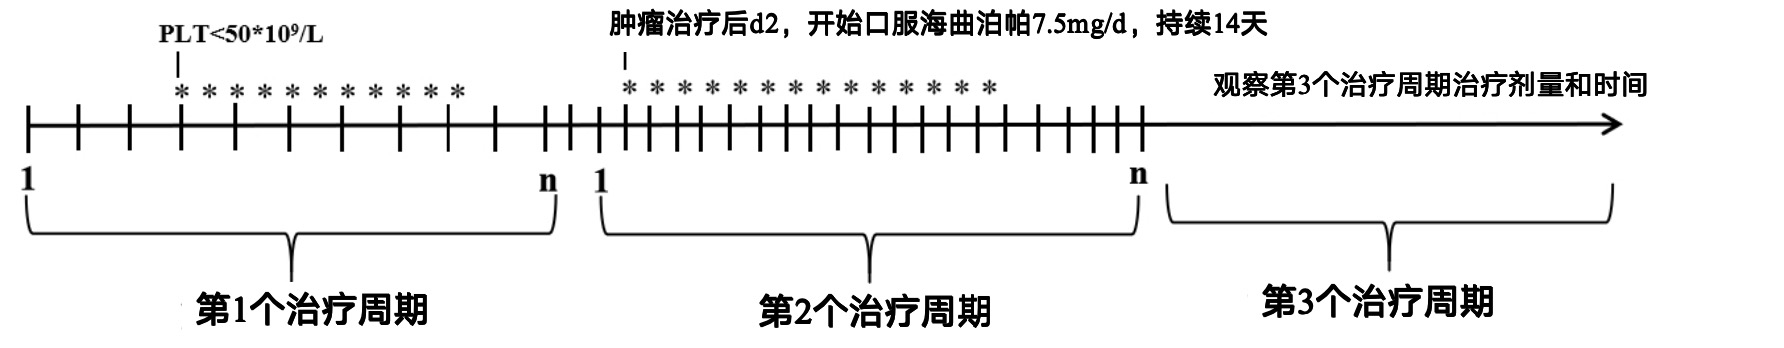  *Herombopag administration |
| **Primary Endpoint** | To evaluate the response rate of platelet elevation in the 2nd tumor treatment cycle (secondary prevention)  (Definition of response: 1. No adjustment of the tumor treatment regimen due to thrombocytopenia (e.g., tumor treatment delay ≥5 days, and/or tumor treatment dose reduction ≥20%, treatment discontinuation, etc.); 2. No use of platelet-increasing rescue therapy; 3. No occurrence of Grade 4 thrombocytopenia; 4. Duration of Grade 3 thrombocytopenia ≤1 week) |
| **Secondary Endpoints** | Response rate of platelet elevation in the 1st tumor treatment cycle; (Definition of response is the same as above)  Differences in the following values between the two tumor treatment cycles:   1. Platelet nadir after tumor treatment; 2. Incidence of platelet count <50×109/L and <25×109/L; 3. Duration of platelet count <50×109/L and <25×109/L; 4. Time to platelet recovery to >100×109/L; 5. Peak platelet count after tumor treatment; 6. Incidence of adverse events (AEs); |
| **Inclusion Criteria** | Patients must meet the following criteria to be enrolled in this study:  1. The patient has signed the informed consent form (ICF) and voluntarily agrees to participate in this study;  2. Males or females aged 18-75 years;  3. Patients with breast cancer confirmed by histopathology or cytology who are currently receiving and will continue to receive the same tumor treatment regimen;  4. Able to receive treatment with the current tumor treatment regimen for at least 2 cycles;  5. First occurrence of platelet count <50×109/L during the current tumor treatment cycle;  6. The investigator determines that the patient is suitable for herombopag administration;  7. Before herombopag administration, neutrophil count ≥1.0×109/L, haemoglobin ≥80g/L;  8. Life expectancy ≥12 weeks at screening;  9. ECOG score: 0-1;  10. Normal function of major organs, no serious complications. |
| **Exclusion Criteria** | Patients with any of the following are prohibited from enrolling in this study:  1. Women who are pregnant or breastfeeding;  2. Unable to understand the nature of the study or have not provided informed consent;  3. Other situations where the investigator deems the patient unsuitable for inclusion in the study;  4. Thrombocytopenia caused by other etiologies (chronic liver disease, sepsis, disseminated intravascular coagulation, immune thrombocytopenia, etc.);  5. History of unstable angina pectoris, cardiac failure congestive, uncontrolled hypertension, uncontrolled arrhythmia, or recent (within 1 year of screening) myocardial infarction;  6. History of hematological disease or bone marrow infiltration by the tumor;  7. Have received concurrent radiotherapy within the last 1 month, or have received pelvic radiotherapy;  8. Arterial or venous thrombotic events within the last 6 months;  9. Have an infection that is difficult to control;  10. Clinical signs of severe haemorrhage within 2 weeks before screening, e.g., gastrointestinal or central nervous system haemorrhage, etc.;  11. Require urgent treatment, such as superior vena cava syndrome, spinal cord compression;  12. Significant liver dysfunction: For patients without liver metastases, ALT/AST > 3xULN (upper limit of normal), TBIL > 3xULN; for patients with liver metastases, ALT/AST ≥ 5xULN, TBIL ≥ 5xULN;  13. Renal dysfunction: blood creatinine ≥ 1.5xULN or eGFR ≤ 60 mL/min (Cockcroft-Gault formula);  14. Have received treatment with thrombopoietin receptor agonist drugs (e.g., eltrombopag, romiplostim), or recombinant human thrombopoietin (rhTPO), recombinant human interleukin-11 (rhIL-11) within 1 month before screening;  15. Have received platelet transfusion within 3 days before randomization;  16. Known or expected allergy or intolerance to the active ingredients or excipients of Herombopag ethanolamine tablets. |
| **Subject Treatment Discontinuation Criteria** | If one or more of the following situations occur, the subject must withdraw from/discontinue treatment  1. The subject has completed the protocol-specified treatment and all follow-ups;  2. Medical or ethical reasons affecting study continuation;  3. Other situations where the investigator deems it necessary to discontinue study treatment. |
| **Study Termination Criteria** | Study termination criteria include but are not limited to the following:  1. Unexpected, significant, or unacceptable risks to subjects are found;  2. The subject becomes pregnant during the treatment period and must withdraw from the study;  3. Other situations where the investigator deems it necessary for a subject to withdraw from the study. |
| Statistics | This is a multicenter, prospective, exploratory clinical study. No formal statistical hypothesis testing will be performed; analysis will primarily use descriptive statistical methods. The primary analysis will estimate the percentage of patients for binary efficacy endpoints, with 95% CIs calculated using the Clopper-Pearson exact method, and exploratory analysis will be conducted for different treatment models. |

# Schedule of Assessment

| **Item** | **Screening Period** | | **Platelet-increasing Drug Intervention Period** | | | | | **End of Study or Withdrawal** | **Safety Follow-up Period** |
| --- | --- | --- | --- | --- | --- | --- | --- | --- | --- |
| **Within 7 days before the 1st tumor treatment cycle** | **After tumor treatment - First discovery of PLT < 50×109/L** | **Visit 1** | **Visit 2** | | | **Visit 3** |
| **1st tumor treatment cycle** | **Within 7 days before the 2nd tumor treatment cycle** | **2nd tumor treatment cycle** | | **3rd tumor treatment cycle** |
| **After starting herombopag administration** | **After the end of tumor treatment, before herombopag administration** | **After starting herombopag administration** |
| Informed consent form | x | |  |  |  |  |  |  |  |
| Demographic data | x | |  |  |  |  |  |  |  |
| Tumor history | x | |  |  |  |  |  |  |  |
| Past medical history | x | |  |  |  |  |  |  |  |
| Administer tumor treatment drugs |  | x |  |  | x |  | X |  |  |
| Administer study drug |  |  | x |  |  | x |  |  |  |
| Vital signs | x |  |  | x |  |  |  | x |  |
| ECOG score | x |  |  | x |  |  |  | x |  |
| Hematology | x | **Starting from day 6 after tumor treatment, blood will be drawn and the subject's complete blood count will be collected every other day.** | | x | **Starting from day 6 after tumor treatment, blood will be drawn and the subject's complete blood count will be collected every other day.** | |  | x |  |
| Blood chemistry | x | **For patients with abnormal liver function, the investigator may re-examine as appropriate.** | | **x** | **For patients with abnormal liver function, the investigator may re-examine as appropriate.** | |  | x |  |
| Urinalysis | x |  |  | x |  |  |  | x |  |
| Coagulation function | x |  |  | x |  |  |  | x |  |
| Electrocardiogram | x |  |  | x |  |  |  | x |  |
| Platelet transfusion | x | x | x | x | x | x |  | x |  |
| WHO Haemorrhage Score | x | x | x | x | x | x |  | x |  |
| Concomitant medications and concomitant therapy | x | x | x | x | x | x |  | x | x |
| Adverse events |  |  | x | x | x | x |  | x | x |

Notes:

1. Reports from other hospitals can be used for all laboratory tests. The investigator may increase the frequency of investigations based on the subject's condition.

2. If any item is abnormal, it should be re-checked at any time or continuously observed until it returns to normal.

# Study Background

Thrombocytopenia is characterized by a platelet count in the peripheral blood that is below the normal level, leading to varying degrees of haemorrhage or risk of haemorrhage. Severe thrombocytopenia is associated with a higher mortality rate. Based on etiology, thrombocytopenia can be divided into decreased platelet production (e.g., leukaemia, bone metastasis of neoplasm malignant, chemotherapy drugs, radiation, aplastic anaemia, anaemia megaloblastic, etc.), increased destruction or consumption (including immune destruction such as immune thrombocytopenia (ITP), systemic lupus erythematosus, etc., and non-immune destruction such as thrombotic thrombocytopenic purpura, vasculitis, etc.), abnormal distribution (splenomegaly caused by various reasons), and platelet loss (e.g., haemorrhage, haemodialysis, etc.). Among them, chemotherapy-induced thrombocytopenia (CIT) is a common type of thrombocytopenia, referring to decreased platelet production and/or increased destruction caused by chemotherapy, clinically manifested as a peripheral blood platelet count below 100×109/L[1]. The timing of the platelet count nadir and the extent of the platelet drop in CIT are related to the chemotherapy drugs used, the dosage, whether combination therapy is used, as well as individual patient differences and the number of chemotherapy cycles. The direct harms of CIT are haemorrhage, such as mucocutaneous haemorrhage, epistaxis, gingival bleeding, haemoptysis, haematemesis, hematuria, increased menstrual flow in women, cerebral haemorrhage, etc. The indirect harms can lead to an increased need for platelet transfusions, chemotherapy dose reduction, chemotherapy delay, or even treatment discontinuation, thereby affecting the course and efficacy of chemotherapy, and even increasing mortality. It also prolongs hospital stays, increases medical costs, and affects long-term clinical outcomes. Severe thrombocytopenia is associated with poor clinical prognosis, including an increased risk of haemorrhage and increased mortality.

At the same time, CIT also increases the demand for platelet transfusions and the complications associated with them. The Chinese expert consensus recommends[2] that for adult patients with leukaemia and most solid tumors, prophylactic platelet transfusion is necessary when the platelet count is ≤10×109/L. When a patient has a neoplasm with a high risk of haemorrhage (such as leukaemia, malignant melanoma, bladder cancer, gynecological neoplasms, colorectal neoplasm, etc.), platelet transfusion should be considered when the platelet count is ≤20×109/L. Meanwhile, the Platelet Transfusion Guidelines published successively by the American Society of Hematology (ASH)[3] in 2007 and the AABB (formerly American Association of Blood Banks)[4] in 2015 also clearly state that the threshold for prophylactic platelet transfusion is a patient's peripheral blood platelet count <10×109/L, while therapeutic platelet transfusion is only recommended for patients with obvious symptoms of haemorrhage or before an anticipated invasive procedure. Platelet transfusion is one of the fastest and most effective treatments for patients with severe thrombocytopenia, but it has poor health and economic consequences. Common adverse reactions include platelet transfusion refractoriness, transfusion-transmitted infectious diseases (such as AIDS, hepatitis c, etc.), transfusion reactions, and even rare fatalities. For patients who require repeated platelet transfusions, as the number of transfusions increases, the magnitude of the platelet increase and the duration it can be maintained will decrease. This poses a huge challenge for patients who need to continue to the next cycle of chemotherapy. If platelet transfusion refractoriness or post-transfusion immune reactions occur, it will lead to chemotherapy dose reduction and/or chemotherapy delay. Furthermore, due to the short half-life of platelets, platelet transfusion can only temporarily improve CIT. Therefore, there is an urgent clinical need for a thrombopoietic drug that can replace platelet transfusion and rapidly increase platelet counts.

Thrombopoietin (TPO) is the most important cytokine in the human body for promoting platelet production. TPO exerts its platelet-promoting effect by binding to the TPO receptor (TPO-R) on the cell surface. TPO receptor agonists (TPO-RA) effectively stimulate platelet production, increase platelet counts, and reduce the incidence of haemorrhagic events by binding to and activating TPO receptors, which activates downstream STAT/MAPK signaling pathways. Currently, TPO-RAs that have entered clinical application include recombinant human TPO (rhTPO), peptide TPO-RAs, and non-peptide TPO-RAs. They are mainly used to treat relapsed/refractory immune thrombocytopenia (ITP), severe aplastic anaemia, neoplasm chemotherapy-induced thrombocytopenia, and perioperative thrombocytopenia in patients with liver disease.

Thrombopoietin is the main regulator of megakaryocyte development and platelet production. Studies have reported that thrombopoietin receptor agonists (TPO-RA) also have a therapeutic effect on chemotherapy-induced thrombocytopenia (CIT). Although this class of drugs has not yet been approved for the CIT indication, given the difficulty in treating CIT and the severity of the haemorrhage risk, most experts believe that TPO-RAs can be considered for patients who have a poor response to IL-11 and/or thrombopoietin (TPO) (2019 CIT Expert Consensus).

Furthermore, other studies have shown that TPO-RAs can reduce the extent of platelet count decline in patients with solid neoplasms and lymphoma after receiving chemotherapy, shorten the duration of thrombocytopenia, and reduce the number of platelet transfusions[5]. Herombopag ethanolamine tablets (available in 3 strengths: 2.5 mg/tablet, 3.75 mg/tablet, and 5 mg/tablet) are an oral, small-molecule, non-peptide TPO-RA developed by Jiangsu Hengrui Pharmaceuticals Co., Ltd. (hereinafter referred to as Jiangsu Hengrui). On June 17, 2021, the National Medical Products Administration (NMPA) approved the marketing application of Herombopag ethanolamine tablets by Hengrui Pharmaceuticals for adult patients with chronic primary immune thrombocytopenia (ITP) who have had an inadequate response to previous treatments such as corticosteroids and immunoglobulins, and have an increased risk of haemorrhage due to thrombocytopenia and clinical conditions, as well as for adult patients with severe aplastic anaemia (SAA) who have had an inadequate response to immunosuppression therapy. As a new TPO-RA drug, a registrational Phase 3 clinical study of herombopag in patients with CTIT is currently underway. As an innovative TPO-RA drug, herombopag has an optimized molecular structure. Based on existing evidence from studies of TPO-RAs in CTIT, this study is designed to explore the patient population, dosing regimen, and efficacy of herombopag in CTIT, which can further guide the clinical application of herombopag in CTIT.

**Non-clinical Pharmacology Studies of Herombopag**

In vitro studies have shown that herombopag ethanolamine has a significant pro-proliferative effect on the thrombopoietin (TPO) receptor-positive cell line 32D-MPL, with an EC50 of 0.4 nM, which is significantly stronger than the positive control drug eltrombopag (approximately 34-fold); herombopag ethanolamine also has significant pro-proliferative and differentiation effects on in vitro cultured human umbilical cord blood CD34+ cells, with EC50 values of 2.3 nM and 4.5 nM, respectively, significantly stronger than eltrombopag (approximately 38-fold and 20-fold); in experiments on promoting the cell cycle, anti-apoptosis, and activation of TPO receptor-dependent STAT and MAPK signal transduction pathways, the activity of herombopag ethanolamine was also stronger than that of eltrombopag. Using an established in vivo hollow fiber evaluation model in nude mice, it was found that herombopag ethanolamine is orally effective (pharmacodynamic effect can be maintained for 3 days), and its activity in specifically promoting the proliferation of 32D-MPL cells in vivo and activating downstream STAT/MAPK signaling pathways is also superior to that of eltrombopag. In addition, the results of in vitro biological activity studies of the herombopag ethanolamine metabolite M1 showed that M1 can promote the proliferation of 32D-MPL cells and the activation of downstream STAT/MAPK signals in a dose-dependent manner, but its activity is significantly weaker than that of herombopag ethanolamine.

**Pharmacokinetic Studies**

Investigators evaluated the pharmacokinetics of oral herombopag in healthy subjects and patients with chronic ITP, respectively. In healthy subjects who took herombopag orally for 10 consecutive days in the 2.5-7.5 mg dose range, similar to the results of the single-dose trial, the plasma concentration-time curve showed a bimodal phenomenon, with the first peak occurring 1-2 h after administration, indicating a relatively fast absorption process, and the second peak in plasma concentration occurring 7-10 h after administration (Zheng et al., 2017). After fasting oral administration of herombopag in the 2.5-7.5 mg dose range, the plasma concentration in patients with chronic ITP increased with the increase in dose. With once-daily administration, the peak plasma concentration was reached 2-5 h after administration, and the steady-state plasma concentration was reached around the 10th day of continuous administration. After absorption, herombopag is extensively metabolized, with the main excretion route being feces (89.05%), followed by urine (8.62%). The elimination half-life of herombopag in plasma is approximately 11.9-40.1h.

**Pharmacodynamic Studies**

After healthy subjects took herombopag orally for 10 consecutive days in the 2.5-7.5 mg dose range, the platelet count (PLT) showed a continuous increase starting from the 6th day of continuous medication, reaching a peak around day 12-14 (2-4 days after drug withdrawal). The mean maximum percentage increases in PLT compared to baseline were 34.1%, 69.9%, and 98.2% for the 2.5 mg, 5 mg, and 7.5 mg groups, respectively. Subsequently, the PLT gradually returned to baseline. On day 18 after drug withdrawal (D28), the PLT in the 2.5 mg group had basically returned to baseline, while the platelet increases in the 5 mg and 7.5 mg groups were still 18.8% and 32.2%, respectively. Patients with chronic ITP took herombopag orally for 14 consecutive days in the 2.5-7.5 mg dose range. The results showed that 12.5%, 58.3%, and 66.7% of patients in the 2.5 mg, 5 mg, and 7.5 mg herombopag groups, respectively, had a PLT ≥50×109/L on day 28 (14 days after drug withdrawal).

**Clinical Efficacy Studies**

**Phase 3 Clinical Study of Herombopag in the Treatment of Primary Immune Thrombocytopenia[6]**

In a multicenter, randomized Phase 3 clinical study of herombopag for the treatment of primary immune thrombocytopenia, 424 patients with a history of primary ITP for at least 6 months who had failed or relapsed after at least one line of ITP-specific treatment (PLT <30×109/L within 48 hours before enrollment) were randomly assigned in a 4:4:1:1 ratio to the herombopag 2.5 mg, 5 mg treatment groups and their corresponding two placebo groups. After completing 10 weeks of treatment, patients entered a 14-week open-label phase. The results showed that after 8 weeks of treatment, the proportion of patients who achieved a treatment response (PLT ≥50×109/L) in the herombopag groups was significantly higher than in the placebo group (herombopag 2.5 mg vs. herombopag 5 mg vs. placebo: 58.9% vs. 64.3% vs. 5.9%, P<0.0001), and the onset of action was rapid. The median time to the first treatment response was 21 days (95% CI: 15-25) for the 2.5 mg group and 14 days (95% CI: 8-14) for the 5 mg group. Herombopag treatment produced a sustained platelet response for 24 weeks, with 44.8% of subjects having a platelet count ≥50×109/L for more than 75% of the total number of tests. The median (minimum, maximum) longest duration of platelet count ≥50×10^9/L was 64 (6, 168) days, and the median total duration was 103 (6, 168) days.

**Phase 2 Clinical Study of Herombopag in the Treatment of Severe Aplastic Anaemia with Inadequate Response to IST[7]**

In a multicenter, single-arm, open-label Phase 2 clinical study of herombopag for the treatment of severe aplastic anaemia with inadequate response to IST, 55 SAA patients who had a poor response to IST and were unsuitable/unwilling to undergo transplant received herombopag treatment (starting dose 7.5 mg). When the platelet count increased by <20×109/L from baseline, the dose was increased by 2.5 mg every 2 weeks, once daily, up to a maximum of 15 mg, for a total of 52 weeks. The results showed that at week 18 of treatment, 23 people achieved a hematologic response, a rate of 41.8%. At week 24, 24 people achieved a hematologic response, a rate of 43.6%. Of these 24 people, 22 (91.7%) still maintained a hematologic response at 52 weeks.

As a newly marketed drug, hetrombopag requires further exploration of its efficacy and safety in chemotherapy-induced thrombocytopenia in real-world clinical settings, with the aim of accumulating evidence-based medical evidence. Special regimens (e.g., T-DM1, platinum-based drugs, gemcitabine, vinorelbine) have a higher risk of causing a decrease in platelets. Similarly, after long-term chemotherapy, the bone marrow function of breast cancer patients will decline to a certain extent. Therefore, other regimens besides the special ones also pose a risk of reducing platelets. It is recommended that patients receiving chemotherapy have their complete blood count re-checked as per routine clinical practice. If their platelet count is found to be below 50×109/L, they may voluntarily return to the hospital to participate in the clinical study.

# 2. Study Objective and Endpoints

## 2.1 Study Objective

To evaluate the efficacy and safety of herombopag for the treatment and secondary prevention of thrombocytopenia caused by breast cancer treatment.

## 2.2 Study Endpoints

### 2.2.1 Primary Endpoint

To evaluate the response rate of platelet-increasing therapy in the 2nd tumor treatment cycle (secondary prevention)

(Definition of response: 1. No adjustment of the tumor treatment regimen due to thrombocytopenia (e.g., tumor treatment delay ≥5 days, and/or tumor treatment dose reduction ≥20%, treatment discontinuation, etc.); 2. No use of platelet-increasing rescue therapy; 3. No occurrence of Grade 4 thrombocytopenia; 4. Duration of Grade 3 thrombocytopenia ≤1 week)

### 2.2.2 Secondary Endpoints

Response rate of platelet-increasing therapy in the 1st tumor treatment cycle; (Definition of response is the same as above)

Differences in the following values between the two tumor treatment cycles:

1. Platelet nadir after tumor treatment;

2. Incidence of platelet count <50×109/L and <25×109/L;

3. Duration of platelet count <50×109/L and <25×109/L;

4. Time to platelet recovery to >100×109/L;

5. Peak platelet count after tumor treatment;

6. Incidence of AEs;

# 3. Investigational Product

## 3.1 Generic Name: Herombopag Olamine tablets

Trade Name: Hengqu

Manufacturer: Jiangsu Hengrui Pharmaceuticals Co., Ltd.

Description: This drug product is a film-coated tablet, which appears light brown to brown after the coating is removed

Strength: 2.5 mg calculated as C25H22N4O5

Usage: This drug product should be taken orally on an empty stomach every morning. Do not eat breakfast within 2 hours of oral administration. Avoid taking with food. The following products should be consumed at least 2 hours after taking the medication, including dairy products (e.g., milk, yogurt, cheese, and ice cream) or mineral supplementation containing polyvalent cations (e.g., aluminum, calcium, magnesium, iron, selenium, and zinc).

Shelf Life: 12 months

Storage Conditions: Protect from light, keep sealed, and store below 25℃

The investigational product is prepared in a GMP-compliant workshop and has passed quality inspection according to the specifications approved by the National Medical Products Administration.

# 4. Study Design

## 4.1 Overall Design

This is a multicenter, prospective, exploratory clinical study. The study includes a screening period (not exceeding 7 days) and a platelet-increasing drug intervention period (2 tumor treatment cycles). Therapeutic use for thrombocytopenia will be conducted in the 1st tumor treatment cycle. Prophylactic use for thrombocytopenia will be conducted in the 2nd tumor treatment cycle.

Subjects will undergo screening evaluation within 7 days before the first dose to determine their eligibility. Eligible subjects can participate in the study, and treatment discontinuation will occur after 2 cycles of use according to the treatment regimen.

The study design diagram is as follows:


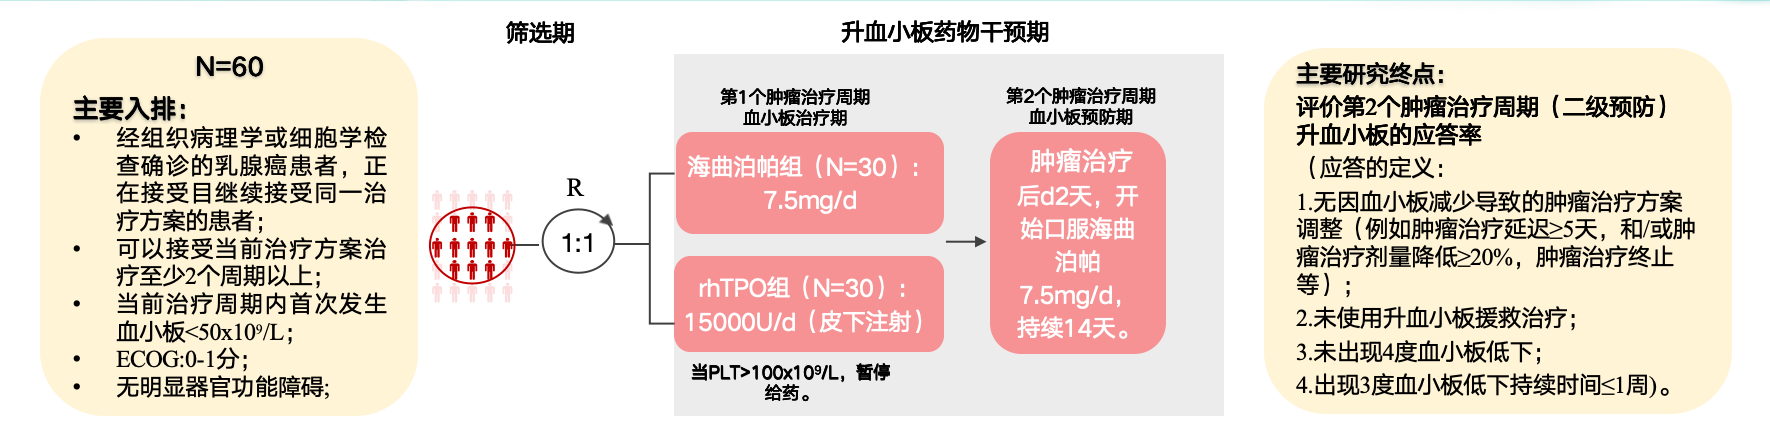


**Screening Period**

**Platelet-increasing Drug Intervention Period**

**N=60**

**Main Inclusion/Exclusion Criteria:**

- Patients with breast cancer confirmed by histopathology or cytology who are currently receiving and will continue to receive the same treatment regimen;
- Able to receive treatment with the current treatment regimen for at least 2 cycles;
- First occurrence of platelet count <50x109/L during the current treatment cycle;
- ECOG score: 0-1;
- No significant organ dysfunction;

**Primary Endpoint**

**Evaluation of the 2nd tumor treatment cycle (secondary prevention)**

**Response rate of platelet elevation**

(Definition of response:

1. No adjustment of the tumor treatment regimen due to thrombocytopenia (e.g., tumor treatment delay >5 days, and/or tumor treatment dose reduction ≥20%, treatment discontinuation, etc.);

2. No use of platelet-increasing rescue therapy;

3. No occurrence of Grade 4 thrombocytopenia;

4. Duration of Grade 3 thrombocytopenia ≤1 week).

**1st tumor treatment cycle**

**Platelet treatment period**

**2nd tumor treatment cycle**

**Platelet prevention period**

**When PLT > 100x109/L, dosing is suspended.**

**Herombopag group (N=30):**

**7.5mg/d**

**Recombinant human thrombopoietin (rhTPO) group (N=30):**

**15000 U/d (subcutaneous injection)**

**On day 2 after tumor treatment, start oral herombopag 7.5 mg/d for 14 days.**

**1st tumor treatment cycle (multicenter, open-label):**

**Therapeutic use:** Starting from day 6 after the end of tumor treatment, blood will be drawn and subject's complete blood count will be collected every other day. Randomization will be performed when platelet count is <50×109/L. Enrolled patients will be randomly assigned to the investigational group and the control group at a 1:1 ratio.

Herombopag group (30 cases): When platelet count is <50×109/L, start oral herombopag 7.5 mg/day. When platelet count > 100×109/L, dosing is suspended.

Note: When platelet count is <10.0×109/L or there is a risk of haemorrhage, platelet transfusion may be considered based on the clinical situation.

rhTPO group (30 cases): When platelet count is <50×109/L, start rhTPO 15000 units/day (subcutaneous injection). When platelet count > 100x109/L, dosing is suspended.

Note: When platelet count is <10.0×109/L or there is a risk of haemorrhage, platelet transfusion may be considered based on the clinical situation.

**2nd tumor treatment cycle (exploratory study):**

**Prophylactic use (total 60 subjects in herombopag group and TPIAO group):** Starting from day 2 after the end of tumor treatment, take oral herombopag 7.5 mg/day (starting dose) for 14 consecutive days. After herombopag administration, the subject's complete blood count will be collected every other day.

The dose adjustment rules for herombopag are as follows:

When platelet count is ≥200×109/L and ≤400×109/L, the daily dose is reduced by 2.5 mg;

When platelet count rises to ≥400×109/L, dosing can be suspended and resumed when platelet count drops to <200×109/L, with the daily dose reduced by 2.5 mg;

Note: The period of drug suspension is also counted within the 14 days. When platelet count is <10.0×109/L or there is a risk of haemorrhage, platelet transfusion may be considered based on the clinical situation.

Dosing Diagram:


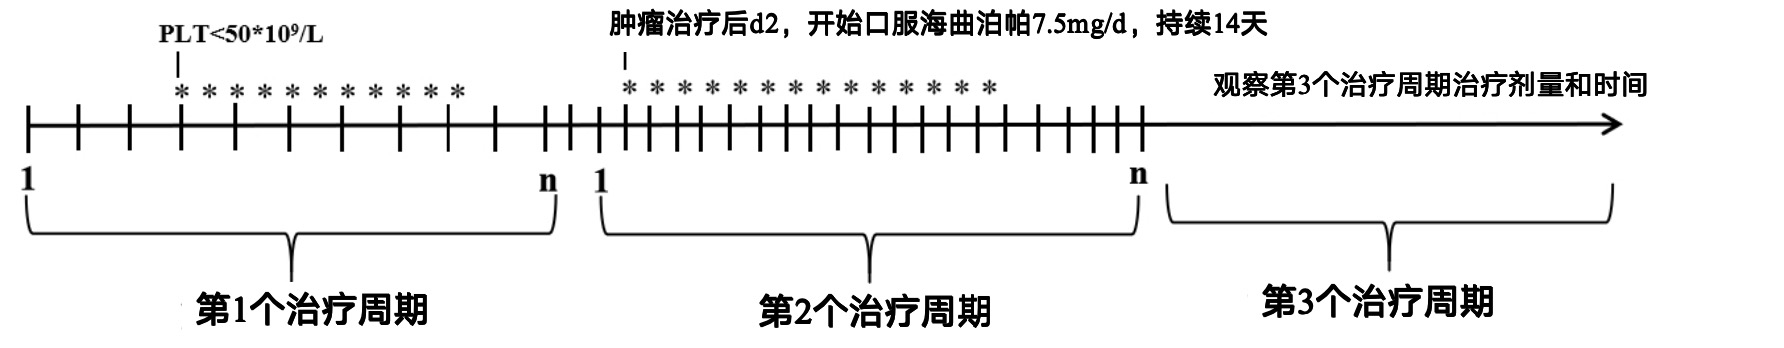


**Day 2 after tumor treatment, start oral herombopag 7.5 mg/d for 14 days**

**Observe treatment dose and timing in the 3rd treatment cycle**

**1st treatment cycle**

**2nd treatment cycle**

**3rd treatment cycle**

*Herombopag administration

## 4.2 Concomitant Medications and Concomitant Therapy

Concomitant medications/concomitant treatments are therapies administered based on the investigator's judgment for the benefit of the subject. All treatments and medications used from 7 days before the first dose until the end of the safety follow-up period should be recorded in the CRF in strict accordance with GCP regulations. If a subject experiences an AE, he/she should be closely monitored, given active symptomatic treatment when necessary, and the medications used should be recorded and explained in the CRF form.

- The investigator is allowed to decide at any time whether platelet transfusion is needed;
- From 1 week before the first dose until the end of the study follow-up period, continuous use of drug therapy that affects platelet function (including but not limited to aspirin, clopidogrel, and/or non-steroidal anti-inflammatory drugs (NSAIDs)) or anticoagulants (such as warfarin, heparin) for more than 2 days is prohibited;

The use of traditional Chinese medicine and proprietary Chinese medicine is not recommended. If necessary, their use requires the investigator's judgment and consent.

# 5. Subject Selection and Withdrawal

Subjects must meet the following criteria to be allowed to participate in this study. Before a subject is included in the study, the investigator should review and confirm whether the subject is suitable to participate in the study.

## 5.1 Inclusion Criteria

Patients must meet the following criteria to be enrolled in this study:

1. The patient has signed the informed consent form (ICF) and voluntarily agrees to participate in this study;

2. Males or females aged 18-75 years;

3. Patients with breast cancer confirmed by histopathology or cytology who are currently receiving and will continue to receive the same tumor treatment regimen;

4. Able to receive treatment with the current tumor treatment regimen for at least 2 cycles;

5. First occurrence of platelet count <50×109/L during the current tumor treatment cycle;

6. The investigator determines that the patient is suitable for herombopag administration;

7. Before herombopag administration, neutrophil count ≥1.0×109/L, haemoglobin ≥80g/L;

8. Life expectancy ≥12 weeks at screening;

9. ECOG score: 0-1;

10. Normal function of major organs, no serious complications.

## 5.2 Exclusion Criteria

Patients with any of the following are prohibited from enrolling in this study:

1. Women who are pregnant or breastfeeding;

2. Unable to understand the nature of the study or have not provided informed consent;

3. Other situations where the investigator deems the patient unsuitable for inclusion in the study;

4. Thrombocytopenia caused by other etiologies (chronic liver disease, sepsis, disseminated intravascular coagulation, immune thrombocytopenia, etc.);

5. History of unstable angina pectoris, cardiac failure congestive, uncontrolled hypertension, uncontrolled arrhythmia, or recent (within 1 year of screening) myocardial infarction;

6. History of hematological disease or bone marrow infiltration by the tumor;

7. Have received concurrent radiotherapy within the last 1 month, or have received pelvic radiotherapy;

8. Arterial or venous thrombotic events within the last 6 months;

9. Have an infection that is difficult to control;

10. Clinical signs of severe haemorrhage within 2 weeks before screening, e.g., gastrointestinal or central nervous system haemorrhage, etc.;

11. Require urgent treatment, such as superior vena cava syndrome, spinal cord compression;

12. Significant liver dysfunction: For patients without liver metastases, ALT/AST > 3xULN (upper limit of normal), TBIL > 3xULN; for patients with liver metastases, ALT/AST ≥ 5xULN, TBIL ≥ 5xULN;

13. Renal dysfunction: blood creatinine ≥ 1.5xULN or eGFR ≤ 60 mL/min (Cockcroft-Gault formula);

14. Have received treatment with thrombopoietin receptor agonist drugs (e.g., eltrombopag, romiplostim), or recombinant human thrombopoietin (rhTPO), recombinant human interleukin-11 (rhIL-11) within 1 month before screening;

15. Have received platelet transfusion within 3 days before randomization;

16. Known or expected allergy or intolerance to the active ingredients or excipients of Herombopag ethanolamine tablets.

## 5.3 Subject Treatment Discontinuation Criteria and Study Termination Criteria

### 5.3.1Subject Treatment Discontinuation Criteria

If one or more of the following situations occur, the subject must withdraw from/discontinue treatment

1. The subject has completed the protocol-specified treatment and all follow-ups;

2. Medical or ethical reasons affecting study continuation;

3. Other situations where the investigator deems it necessary to discontinue study treatment.

### 5.3.2 Study Termination Criteria

Study termination criteria include but are not limited to the following:

1. Unexpected, significant, or unacceptable risks to subjects are found;

2. The subject becomes pregnant during the treatment period and must withdraw from the study;

3. Other situations where the investigator deems it necessary for a subject to withdraw from the study.

# 6. Study Procedures

The utmost effort will be made to ensure that the required tests and procedures are carried out according to the protocol. However, unscheduled situations occur from time to time beyond the investigator’s control, making the examinations difficult to perform. In such cases, the investigator must take all necessary measures to ensure the safety and interests of the subjects. When a required test cannot be conducted, the investigator needs to record the reasons. Additionally, the study team should be promptly notified of any unexpected situations in a timely manner.

## 6.1 Screening Period Visit

The screening period starts from signing of the ICF and ends at screening failure. The screening period is from 7 days before the 1st tumor treatment cycle to after the end of tumor treatment until the first discovery of PLT < 50×109/L.

Please complete the following investigations and records during the screening period:

- ICF signed by the subject;
- Demographic data;
- Tumor history:
- Past medical history: treatment history of other past diseases, history of other concomitant neoplasms;
- Vital signs: body height, weight, body temperature, respiratory rate, heart rate, blood pressure;
- ECOG score;
- Laboratory tests: Hematology (complete blood count: 1 hematology test before tumor treatment, blood drawn starting from d6 after tumor treatment, subject's hematology collected every other day), blood biochemistry (1 blood biochemistry test before tumor treatment, if the patient has abnormal hepatic function, the investigator may re-examine as appropriate), urinalysis, coagulation function;
- Electrocardiogram;
- Record platelet transfusion volume;
- WHO haemorrhage score;
- Concomitant medications and concomitant therapy;
- Administer tumor treatment drugs.

## 6.2 Platelet-Increasing Drug Intervention Period Visit

1. Investigations required before tumor treatment in each cycle: Hematology, blood biochemistry, urinalysis, coagulation function, electrocardiogram, platelet transfusion, WHO haemorrhage score, concomitant medications and concomitant therapy, AEs.
2. During the study drug administration period: Investigations required include: Hematology (subject's hematology collected every other day), blood biochemistry (**if the patient has abnormal hepatic function, the investigator may re-examine as appropriate**), platelet transfusion, WHO haemorrhage score, concomitant medications and concomitant therapy, AEs.

## 6.3 End of Study or Withdrawal Follow-up Assessment

When the subject ends herombopag treatment or withdraws from the study (±3d), the investigations to be performed include:

- Vital signs: body height, weight, body temperature, respiratory rate, heart rate, blood pressure;
- ECOG score;
- Laboratory tests: Hematology, blood biochemistry, urinalysis, coagulation function;
- Electrocardiogram;
- Record the dose and time of tumor treatment drug use;
- Record platelet transfusion volume;
- WHO haemorrhage score;
- Concomitant medications and concomitant therapy;
- AEs.

## 6.4 Safety Follow-up Period Assessment

During the safety follow-up period (30d±3d after the last dose of herombopag), SAEs related to the study drug, and their concomitant medications or concomitant therapies will be recorded.

After the study ends, the investigator and the subject will jointly decide on the next course of treatment, and it will be well documented. All AEs/SAEs must be followed until symptom resolution, or until clinically relevant changes in laboratory values return to baseline and/or ≤ Grade 1, or until reasonable explanation is obtained (e.g., lost to follow-up, death), or until the event is definitively confirmed as unrelated to study drugs or procedures by the end of the safety follow-up period; after the safety follow-up period, the investigator only needs to report SAEs related to the study drugs.

# 7. Adverse Event Reporting

## 7.1 Definition and Recording of Adverse Events

An adverse event (AE) is defined as any untoward medical occurrence in a clinical study subject after receiving a drug, but does not necessarily have a causal relationship with the treatment. An AE can be any unfavorable and unexpected symptoms, signs, laboratory abnormalities, or diseases, including the following situations:

1) Pre-existing medical conditions/diseases (existing before entering the clinical study) are only recorded as AEs if they worsen after starting the study drugs (including worsening of symptoms, signs, and laboratory test abnormalities);

2) Any new AEs: any new adverse medical conditions (including symptoms, signs, newly diagnosed diseases);

3) Abnormal and clinically significant laboratory test results.

Any invasive procedures (such as surgery) and non-invasive procedures for diagnosis or treatment should not be reported as an AE. However, if the medical condition leading to the procedure meets the definition of an AE, it should be reported as an AE. For example, acute appendicitis occurring during the AE reporting period should be reported as an AE, while the appendectomy performed as a result should be documented as the treatment of the AE.

The investigator should record in detail any AE occurring in subjects, including: AE name, onset and end times, severity (graded according to NCI CTCAE v5.0), relationship between the AE and the study drugs, duration, actions taken with the study drugs due to the AE, AE outcome, and whether it is a serious adverse event, etc.

## 7.2 Criteria for AE Severity

Refer to the NCI-CTCAE v5.0 grading criteria for adverse drug events. The following criteria should be used for AEs not listed in the NCI-CTCAE v5.0:

| Grade | Clinical Description of Severity |
| --- | --- |
| 1 | Mild: asymptomatic or mild symptoms; clinical or diagnostic observations only; no intervention indicated |
| 2 | Moderate; requiring minor, local, or non-invasive treatment; limitations in age-appropriate instrumental Activities of Daily Living (ADL); instrumental ADL refer to cooking, shopping, making phone calls, and counting money, etc. |
| 3 | Severe: Severe or medically significant but not immediately life-threatening; hospitalization or prolongation of hospitalization indicated; disabling; limiting self-care ADL. Self-care ADL refers to bathing, dressing and undressing, feeding self, using the toilet, taking medicine, etc., and not bedridden. |
| 4 | Life-threatening; urgent intervention indicated: |
| 5 | Death related to AE |

It should be noted to the distinction between the severity of AEs and their seriousness. For example, "serious headache" may be graded as severe in severity but should not be classified as an SAE unless it meets SAE criteria.

## 7.3 Determination of Causality between AE and the Study Drug

The investigator should comprehensively assess whether there is a reasonable possibility that the study drugs cause or contribute to the AE. Factors for determination include: whether the AE onset has a reasonable temporal relationship with study drug administration, the toxicological and pharmacological properties of the study drugs, use of concomitant medications, the subject’s pre-existing disease, medical history, family history, and dechallenge/rechallenge responses. The possible causality between the AE and the study drug should be assessed as "definitely related, possibly related, unlikely related, not related, and not evaluable" using a five-level classification method.

## 7.4 Serious Adverse Events

### 7.4.1 Definition of Serious Adverse Event

A Serious Adverse Event (SAE) refers to an AE that occurs during the clinical study and meets one or more of the following criteria:

- Events leading to death;
- Life-threatening events (the term "life-threatening" refers to the subject being at risk of death at the time of the event/reaction; it does not imply that the event will lead to death if the condition worsens);
- Events requiring hospitalization or prolongation of hospitalization;
- Events that may lead to permanent or serious disability/functional impairment;
- Congenital anomalies or birth defects;
- Other important medical events (referring to events/reactions that may not immediately be life-threatening, result in death, or require hospitalization, but based on reasonable medical and scientific judgment, may jeopardize the subject or may require intervention [such as medication or surgery] to prevent one of the serious outcomes listed in the definition above).

### 7.4.2 Hospitalization

AEs in clinical studies that lead to hospitalization (even if less than 24 hours) or prolongation of existing hospitalization should be considered as SAEs. However, hospitalization or prolongation of hospitalization for the following reasons should not be reported as an SAE:

- Rehabilitation facility
- Sanatorium
- Routine emergency room treatment (less than 24 hours)
- Day surgery (such as outpatient/day/ambulatory surgery)
- Social reasons (medical insurance reimbursement, etc.)
- Any hospitalization or prolongation of hospitalization unrelated to the AEs is not considered as an SAE. It may include but is not limited to the following:

1. Hospitalization due to a pre-existing disease for treatment, unrelated to a new AE and not involving exacerbation of the pre-existing disease (e.g., hospitalization for diagnostic examination of laboratory test abnormalities that occurred prior to the study and are still present);
2. Hospitalization due to administrative reasons (e.g., annual routine physical examination);
3. On-study hospitalization as specified in the protocol (e.g., protocol-specified procedures);
4. Elective hospitalization for any cause other than the AEs (e.g., elective cosmetic surgery);
5. Pre-scheduled treatment or surgery, which should be documented in the study protocol and/or the subject’s baseline data;
6. Hospitalization for blood product use only.

## 7.5 Collection/Follow-up of AEs/SAEs and Reporting of SAEs

### 7.5.1 Collection of AEs/SAEs

The collection of AEs/SAEs starts after the subject uses the study drugs until the end of the safety follow-up period, i.e., 30 days after the end of the study.

If a subject starts other new anti-tumor therapy before the end of the safety follow-up period, the collection period for non-fatal AEs/SAEs suspected to be unrelated to the study drugs ends upon the start of the new anti-tumor therapy.

Deaths occurring during the safety follow-up period must be reported as SAEs, regardless of whether or not there are other treatments.

After the safety follow-up period, the investigator only needs to report SAEs related to the study drugs.

### 7.5.2 Follow-up of AEs/SAEs

The investigator should inquire about the AE/SAEs that occur after the last visit at each visit, and provide follow-up information in a timely manner according to the queries received.

All AEs/SAEs must be followed until symptom resolution, or until clinically relevant changes in laboratory values return to baseline and/or ≤ Grade 1, or until reasonable explanation is obtained (e.g., lost to follow-up, death), or until the event is definitively confirmed as unrelated to study drugs or procedures by the end of the safety follow-up period.

### 7.5.3 SAE Reporting Procedures

If an SAE occurs, whether it is an initial report or a follow-up report, the investigator must immediately fill out the "Serious Adverse Event Report Form", sign and date it, and promptly report to relevant departments within 24 hours of becoming aware. If the SAE occurs after initiation of the study drugs, it must also be reported to Hengrui Drug Safety Department (hengrui_drug_safety@hengrui.com).

For all SAEs, the symptoms, severity (referencing NCI-CTCAE v5.0), relationship to each study drug, time of occurrence, time of management, measures taken for each study drug due to the SAE, follow-up time and manner, and outcome should be recorded in detail. If the investigator thinks that an SAE is not related to the study drug but potentially related to the study conditions (e.g., discontinuation of the pre-existing treatment, or complications during the study), details should be described in the narrative section of the SAE report. If the severity of an ongoing SAE or its relationship to the study drug is changed, a follow-up report should be submitted immediately. If the investigator believes that previously reported SAE information was misreported, then correction, revocation or downgrading instructions may be made through a follow-up report, which should be submitted in accordance with the SAE reporting procedures.

## 7.6 Reporting of Pregnancy

If a female subject becomes pregnant during the clinical study, the subject must immediately discontinue the study drug and withdraw from the study. If the partner of a male subject becomes pregnant during the clinical study, the subject will continue study participation.

During the clinical study, the investigator must complete the Clinical Trial Pregnancy Report/Follow-up Form and report to relevant authorities within 24 hours of becoming aware of the pregnancy event; if pregnancy occurs after the initiation of the study drugs, the Hengrui Clinical Trial Pregnancy Report/Follow-up Form must be completed and submitted to Hengrui Drug Safety Department within 15 days of the investigator’s awareness.

The investigator must track pregnancy events until final outcomes (including any premature termination of pregnancy or delivery). For deliveries, follow-up must continue until 1 month postpartum, with results reported to relevant authorities and Hengrui Drug Safety Department.

If the pregnancy outcome is ectopic pregnancy, spontaneous abortion, fetal intrauterine death, death neonatal, or congenital abnormality, it will be considered as an SAE and should be reported within specified time limit for SAE reporting.

If a subject becomes pregnant and develops an SAE during pregnancy, the investigator should also fill out the Serious Adverse Event Report Form, and report according to SAE reporting procedures.

## 7.7 Disease Progression and Death

Disease progression is defined as the worsening of the subject’s condition caused by the indication of the study. It includes radiological progression and the progression of clinical symptoms and signs. A new lesion of the primary tumor or progression of an existing lesion will be considered PD.

Events that are life-threatening or that require hospitalization or prolongation of hospitalization, or that result in permanent or significant disability/functional loss will not be considered SAEs for reporting if they are due to symptoms and signs of disease progression. If there is any uncertainty as to whether an SAE is caused by PD, it should be reported as an SAE.

In the study population of this study, “PD” is an expected occurrence and should not be reported as an AE term. When PD occurs, the event used to confirm PD should be reported as an AE. For example, if a subject has epilepsy that is determined to be related to brain metastasis, the AE term should be recorded as “epilepsy”, rather than “PD” or “brain metastasis”.

During the safety follow-up period, deaths that are assessed by the investigator as possibly due to symptoms and signs of PD must be reported as SAEs.

However, the term "death" should not be used as an SAE term but rather as the outcome of an event. The adverse event that caused or contributed to death should be recorded as the SAE term. If the cause of death cannot be determined at the time of reporting, the SAE term should be recorded as "death of unknown cause".

# 8. Study Management

## 8.1 Ethics and Informed Consent

This clinical study must be conducted in accordance with the Declaration of Helsinki (1996 version), the Good Clinical Practice (GCP 2020 version) promulgated by the NMPA of China, and relevant regulations. Prior to the commencement of the study, approval from the EC must be obtained. Any modifications to the protocol during the study must be reported to and approved by the EC.

Before the start of the clinical study, the protocol must be reviewed and approved by the Ethics Committee, and its signed approval must be obtained before implementation. During the clinical study, any amendments to the protocol must be approved by the Ethics Committee before they can be implemented.

The clinical investigator will adhere to all applicable regulations to protect subjects. The ICF used during the informed consent process must be approved by the EC and be available for inspection.

The clinical investigator must explain to subjects that participation in this clinical study is voluntary, they have the right to withdraw from the study at any time and at any stage of the study without being discriminated against or retaliated, their medical treatment and rights will not be affected, and they can continue to receive alternative treatments. Subjects must be made aware that their participation in the study and their personal information will be kept confidential. They should also be informed about the nature of the clinical study, study objectives, the potential benefits, and risks and inconveniences that may arise. Subjects should be informed about other available treatment options and their rights and obligations as outlined in the Declaration of Helsinki. They should be given sufficient time to consider whether they wish to participate in the study and sign the ICF.

## 8.2 Data Management

### 8.2.1 Case Report Form

A complete CRF should be recorded for each subject participating in the clinical study. The principal investigator should properly keep the completed original CRFs. Investigators bear ultimate responsibility for the collection and reporting of all clinical safety and laboratory data recorded in CRFs and other data collection forms (source documents), to ensure the attributable, legible, timely, original, accurate, enduring, complete, and consistent nature of the records.

The CRF must be signed and confirmed by the investigator or authorized personnel to verify that the data recorded in the CRF are authentic. Any data corrections in the CRF or source documents must be dated, signed, and accompanied by necessary explanations, without obscuring the original entries.

In general, source documents refer to hospital or physician records. In such cases, data collected in the CRF must align with these records. Under specific circumstances, the CRF itself may serve as the source document. In this case, the study site needs to have relevant documentation to clarify which data will be recorded in the CRF and to use the CRF as the source document.

### 8.2.2 Retention of Study Records

To meet regulatory authority or sponsor's audit and/or inspection requirements, investigators/institutions must agree to retain relevant records, including: identification codes for all enrolled subjects (sufficient information to link records such as CRFs and hospital documents), all original signed ICFs, all CRF copies, safety report forms, source documents, treatment details, and relevant correspondence (e.g., letters, meeting minutes, telephone reports). Investigators/institutions must maintain records in accordance with applicable regulatory requirements.

# 9. Data Analysis and Statistical Methods

## 9.1 Sample Size Calculation

This is a multicenter, prospective, exploratory study with no statistical hypothesis. Based on early study data, the response rate of platelet elevation in the second cycle is expected to reach 50% for patients with thrombocytopenia caused by breast cancer treatment who are treated with herombopag in this study. Calculated using NCSS PASS 21 (LLC. Kaysville, Utah, USA, ncss.com/software/pass), with an enrollment of approximately 60 subjects, the two-sided 95% confidence interval ([Clopper-Pearson method]) for the platelet elevation response rate in the second cycle is [37%, 63%].

## 9.2 Analysis Populations

Full Analysis Set (FAS): It includes all enrolled subjects who have received at least one dose of the study drug. The FAS serves as the primary analysis set for the efficacy endpoints in this study.

Per-Protocol Set (PPS): A subset of the FAS, including all subjects from the FAS who completed the treatment and visits as defined in the protocol and had no major protocol deviations. The criteria for determining major protocol deviations must be finalized before database lock. The list of subjects to be included in or excluded from the PPS must be jointly confirmed during the data review meeting by the principal investigator, statistician, and sponsor prior to database lock. Per-Protocol Set (PPS): The PPS is the secondary analysis set for the efficacy endpoints in this study.

Safety Set (SS): It includes all randomized and enrolled subjects who have received at least one dose of the study drug. The SS will be used for all safety analyses and will be analyzed according to the actual treatment received by the subjects.

## 9.3 Statistical Methods

### 9.3.1 General Principles of Statistical Analysis

Analyses will be performed using the SAS® system version 9.4 or higher. All tables, figures, and listings will be generated in RTF format.

In descriptive statistical analyses, unless otherwise specified, categorical data will be presented with the number of subjects (n) and percentage (%) for each category level, along with missing counts and percentages. For continuous data, the number of non-missing subjects (n), arithmetic mean, standard deviation, median, minimum, and maximum will be provided.

### 9.3.2 Efficacy Analysis

For continuous efficacy endpoints, the number of subjects, arithmetic mean, standard deviation, median, minimum, and maximum will be summarized for each category.

For binary efficacy endpoints, the number of subjects and percentage will be summarized for each category, and the 95% CI for the rate will be calculated using the Clopper-Pearson method.

### 9.3.3 Handling of Missing Data

Imputation will not be performed for missing data in this study.

### 9.3.4 Safety Analysis

In this study, treatment-emergent adverse events (TEAEs) are defined as any adverse events that occur or worsen from the first dose of the study drug until 30 days after the last dose. All summary tables will be based on TEAEs.

AEs will be coded using the MedDRA dictionary and summarized by system organ class (SOC) and preferred term (PT), relationship to the study drug, and CTCAE 5.0 severity grading.

The following types of AEs will be summarized:

- All TEAEs; all TEAEs related to the study drug
- TEAEs of CTCAE Grade ≥3; TEAEs related to the study drug with CTCAE Grade ≥3
- Treatment-emergent SAEs; SAEs related to the study drug
- TEAEs leading to permanent discontinuation; TEAEs related to the study drug leading to permanent discontinuation
- TEAEs leading to dose reduction; TEAEs related to the study drug leading to dose reduction
- TEAEs leading to dose interruption; TEAEs related to the study drug leading to dose interruption
- TEAEs leading to study withdrawal; TEAEs related to the study drug leading to study withdrawal
- TEAEs of special interest, TEAEs of special interest related to the study drug
- TEAEs leading to death; TEAEs related to the study drug leading to death

The number and percentage of subjects experiencing each type of AE will be provided. If a subject experiences multiple AEs within the same SOC or PT, only the event with the highest severity will be counted. TEAEs related to the study drug include those definitely, possibly, or indeterminately related to the study drug, or those with missing relatedness data.

**Laboratory Tests, Vital Signs, Electrocardiogram**

For continuous variables, measurements at each planned visit point and changes relative to baseline will be summarized. For categorical variables, the number and percentage of subjects in each category will be provided at every planned visit point.

For laboratory tests and electrocardiogram results, cross-tabulation will be used to summarize clinically significant normal/abnormal changes from baseline to post-treatment assessments. Post-treatment data with the most severe clinical significance determination will be selected for summary, including unscheduled visit data.

Additionally, laboratory test indicators will be graded according to CTCAE 5.0 severity criteria, with baseline-to-post-treatment grade changes summarized via cross-tabulation. Post-treatment data with the most severe grading will be selected for summary, including unscheduled visit data.

All clinically significant abnormal results from laboratory tests, vital signs, electrocardiograms, and physical examinations will be listed in tabular form.

The above analyses will be conducted based on the actual visit points and corresponding content collected in the CRF form.

# 10. Clinical Study Timeline

Estimated enrollment of the first subject: June 2022

Estimated enrollment of the last subject: August 2024

Estimated withdrawal of the last subject: October 2024

Estimated study completion date: December 2024

# 11. References

1. Internal Medicine Branch of Chinese Medical Association. Chinese expert consensus on the diagnosis and treatment of adult thrombocytopenia[J]. Chinese Journal of Internal Medicine, 2020,59(7):498-510.
2. Chinese Society of Clinical Oncology. Chinese expert consensus on the diagnosis and treatment of chemotherapy-induced thrombocytopenia (2018 edition). Chinese Journal of Oncology, 2018, 40(9):714-20.
3. Slichter SJ. Evidence-based platelet transfusion guidelines. Hematology Am Soc Hematol Educ Program, 2007, 1(1):172-178.
4. Kaufman RM, Djulbegovic B, Gernsheimer T, et al. Platelet transfusion: A clinical practice guideline from the AABB. Ann Intern Med, 2015, 162(3):205-213.
5. TPIAO package insert.
6. Fengkui Zhang, et al. Blood 2020; 136 (Supplement 1): 3-4.
7. Mei H , X Liu, Li Y , et al. A multicenter, randomized phase III trial of hetrombopag: a novel thrombopoietin receptor agonist for the treatment of immune thrombocytopenia[J]. Journal of Hematology & Oncology, 2021.
