# Supplementary material
Source: Research Square preprint supplement (doi:10.21203/rs.3.rs-8976504/v1)
Supplement: Supplementary file 2 [file b1c476ee0497eff0ea453cf4.docx]

Supplementary Appendix 2: Platelet parameters and thrombocytopenia occurrence in CBR-treated patients during the TTP

| **Secondary endpoints** | **Hetrombopag  group (n=10)** | **rhTPO  group (n=4)** | **CBR (N=14)** |
| --- | --- | --- | --- |
| PLT nadir (×10⁹/L; median, range) | 44.5 (12, 164) | 53.0 (49, 61) | 49.0 (12, 164) |
| PLT maxmium (×10⁹/L; median, range) | 132.0 (81, 195) | 132.0 (113, 155) | 132.0 (81, 195) |
| Grade 4 thrombocytopenia (PLT <25×10⁹/L; n, %) | 2 (20.0) | 0 | 2 (14.3) |
| Median duration of grade 4 thrombocytopenia (PLT<25×10⁹/L; days) | 3.5 | NA | 3.5 |
| Grade 3/4 thrombocytopenia (PLT <50×10⁹/L; n, %) | 8 (80.0) | 1 (25.0) | 9 (64.3) |
| Median duration of grade 3/4 thrombocytopenia (PLT<50×10⁹/L; days) | 2.0 | 3.0 | 2.0 |
| Median duration of TTP (days) | 8.0 | 9.5 | 8.0 |
